# Supplementary material for: N+-ion irradiation engineering towards the efficient oxygen evolution reaction on NiO nanosheet arrays
Source: Royal Society of Chemistry journal article supplement (doi:10.1039/c9ta00023b), 2019-01-01
Supplement: c9ta00023b1.pdf [file c9ta00023b1.pdf]

## Supplementary information

of

### N<sup>+</sup> Ions Irradiation Engineering towards Efficient Oxygen Evolution Reaction on NiO Nanosheet Arrays

*Baorui Xia<sup>1</sup>, Tongtong Wang<sup>1</sup>, Xingdong Jiang<sup>1</sup>, Jun Li<sup>2</sup>, Tongming Zhang<sup>2</sup>, Pinxian Xi<sup>1</sup>, Daqiang Gao<sup>1\*</sup>, Desheng Xue<sup>1</sup>*

<sup>1</sup>Key Laboratory for Magnetism and Magnetic Materials of MOE, Key Laboratory of  
Special Function Materials and Structure Design of MOE, Lanzhou University,  
Lanzhou 730000, P. R. China

2320 kV platform for multi-discipline research with highly charged ions at the  
Institute of Modern Physics, CAS, Lanzhou 730000, P. R. China

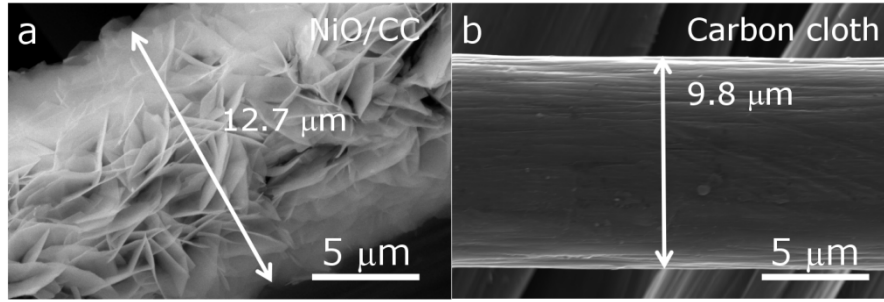

**Figure S1** Scanning electron microscope images of bare carbon cloth.

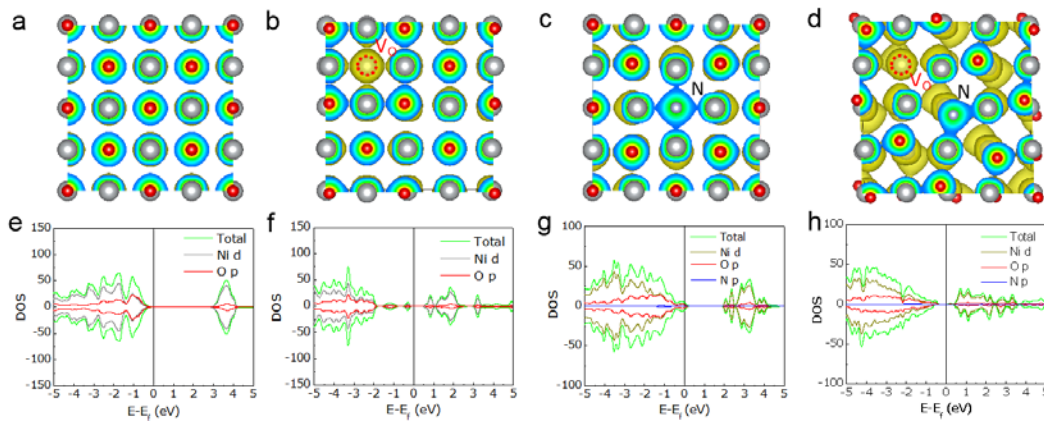

**Figure S2** Charge density distribution of (a) NiO, (b) VO introduced NiO, (c) N doped NiO and (d) N, VO coexisted NiO. Calculated DOS results of (a) NiO, (b) VO introduced NiO, (c) N doped NiO and (d) N, VO coexisted NiO.

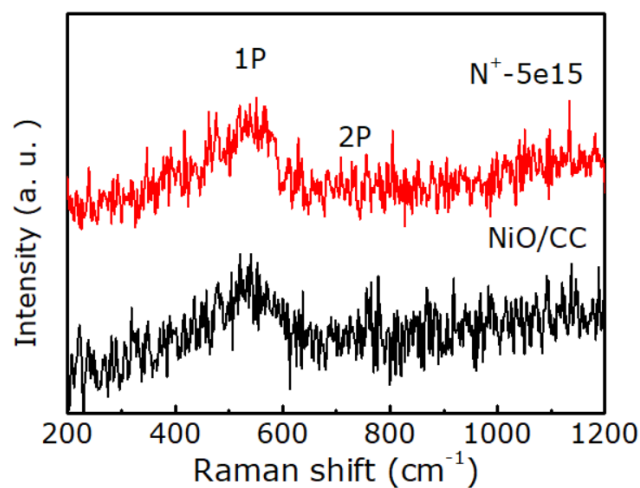

**Figure S3** Raman spectra of NiO/CC and N<sup>+</sup>-5e15.

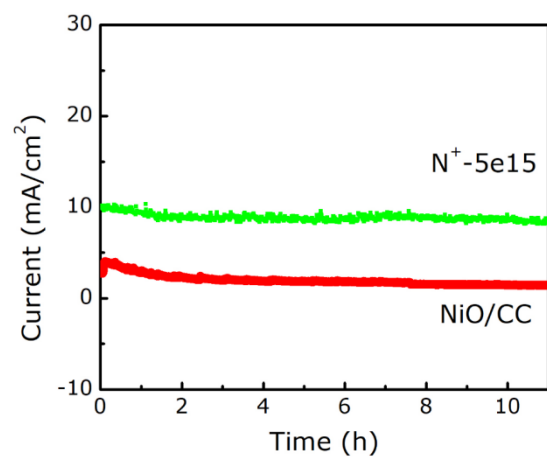

**Figure S4** The durability of electrocatalytic electrodes made of NiO/CC and N<sup>+</sup>-5e15.

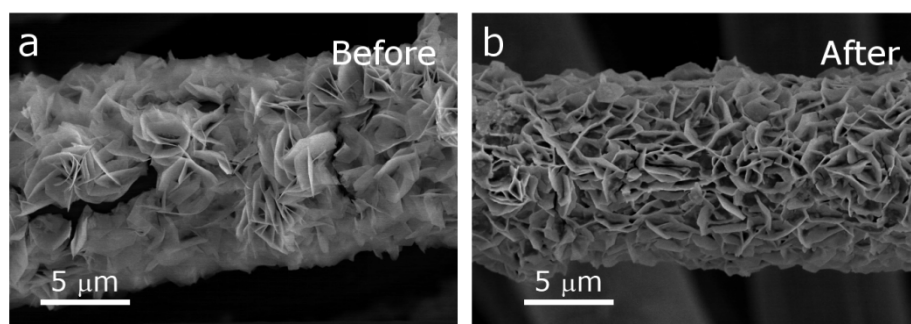

**Figure S5** SEM images of N<sup>+</sup>-5e15 captured before and after OER measurement.

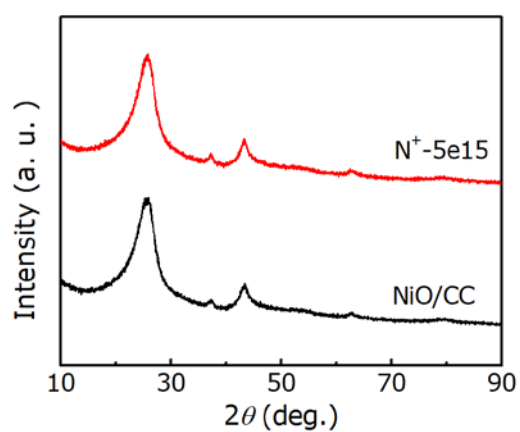

**Figure S6** XRD patterns of N<sup>+</sup>-5e15 before and measured after OER cycling.

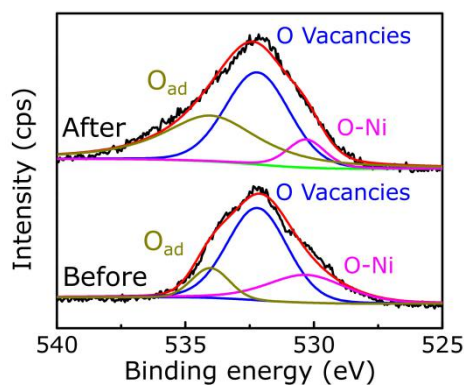

**Figure S7** O 1s XPS results of N<sup>+</sup>-5e15 measured before and after OER cycling.

**Table S1** OER electrocatalytic performance of several NiO-based electrodes

|                                 | $\eta_{10}$ (V) | $\eta_{100}$ (V) | Tafel slope (mV/dec) |
|---------------------------------|-----------------|------------------|----------------------|
| NiO NSs <sup>[1]</sup>          | -               | -                | 225                  |
| NiO/Fe <sup>[2]</sup>           | 1.71            | -                | -                    |
| NiO <sub>x</sub> <sup>[3]</sup> | 1.92            | -                | -                    |
| FeNC/NiO <sup>[4]</sup>         | 1.67            | -                | -                    |
| N <sup>+</sup> -5e15            | 1.63            | 1.98             | 136                  |

#### Additional details

#### Experiments

In this paper, NiO nanosheets loaded on carbon clothes (NiO/CC) were synthesized by hydrothermal and annealing process. Firstly, Ni(NO<sub>3</sub>)<sub>2</sub>·6H<sub>2</sub>O (4.4 mmol, 1.279 g), NH<sub>4</sub>F (22 mmol, 0.814 g) and urea (55 mmol, 3.303 g) were dissolved in distilled water (88 mL). After stirring, the solution was transferred to a 100 mL steel autoclave with a piece of carbon cloth (1 cm×3 cm) sealed into the

solution. After heating at 120 °C for 16 h in a vacuum oven, the carbon fiber coated with Ni-LDH was washed with distilled water and ethanol for several times. Subsequently, the as-prepared samples were annealed at 400 °C for 2 h under Ar (50 sccm) atmosphere. After this procedure, the NiO nanosheets loaded on carbon clothes were obtained. Finally, we selected a piece of sample and carried out N<sup>+</sup> ions irradiation for it. In this experiment, the N<sup>+</sup> ions were accelerated by a voltage of 50 kV and formed high-energy nitrogen beam, which vertically irradiated on the surfaces of the samples.

#### *Materials Characterizations:*

X-ray diffraction spectra (XRD; X'pert Pro Philips with Cu K<sub>α</sub> radiation) and were used to study the crystal structure of NiO catalysts. Scanning electron microscopy (SEM; TESCAN MIRA3) and and transmission electron microscopy (TEM; Tecnai G2 F30, FEI) were used to observe the morphology of NiO samples. X-ray photoelectron spectroscopy (XPS; Kratos AXIS UltraDLD), Raman spectra (Jobin-Yvon LabRam HR80, 532 nm) were used to investigate the native vacancies of NiO samples. Electron spin resonance (ESR JEOL, JES-FA300, microwave frequency is 8.984 GHz) measurement was employed to study the resonance field of the samples.

#### *Electrochemical measurement:*

The electrochemical measurements were conducted on a CHI 660E electrochemical workstation with a typical three-electrode system. During the measurement, Ag/AgCl electrode was used as the reference electrode, while a Pt filament was employed as the counter electrode. Besides, The sample was held by conductive clamp, was regarded as the working electrode. All the OER tests were carried out in 0.1 M KOH electrolyte (pH=13). Before the measurement, it takes 8000-10000 cycles of CV measurement (in the range of 0-0.2 V) to active the electrodes to the stable status. Linear sweep voltammetry (LSV) was measured with a scan rate of 2 mV/s. In this experiment, the practical overpotentials were calibrated with respect to a reversible hydrogen electrode using  $E_{RHE} = E_{Ag/AgCl} + 0.059 \times 13$  mV. The cyclic voltammetry (CV) measurement was conducted with the range from 0 V to 0.2 V by different scan rates (from 20 mV/s to 180 mV/s). Electrochemical impedance spectroscopy (EIS) measurements were carried out with frequencies ranging from 0.1 Hz to 100 kHz at the voltage of -500 mV (vs. RHE). A simplified Randles circuit was used to fit the impedance data to extract the solution ( $R_s$ ) and charge-transfer resistance ( $R_{ct}$ ). The turnover frequency (TOF) was calculated with the equation:  $TOF = I/Q$ , where  $I$  (A) obtained from the LSV measurements is the current of the polarization curve. Voltammetry charges ( $Q$ ) is calculated by the following equation:  $Q = 2Fn$ , Where  $F$  is Faraday constant (96480 C/mol),  $n$  is the number of active sites. In the experiment, the voltammetry curve is obtained by CVs measurements with phosphate buffer solution (pH = 7) at the scan rate of 50 mV/s. The number of  $Q$  is evaluated after deducting the blank value. The derivation and calculation follow the

equations:  $Q=CU=iU/v$ . In a CV curve,  $i$  and  $U$  are changing, so we can get by integral the CV curve, where  $v$  is the scan rate (50 mV/s). In the experiment, the relationship between impedance ( $Z$ ) and voltage is established for both NiO/CC and  $N^+-5e15$  electrodes. The capacitance ( $C$ ) is calculated using the equation:  $C = -1/2 \pi f Z$ , where  $f$  is the fixed frequency of voltage, which is set as 100 Hz during the measurement and  $Z$  is the impedance.

#### *First-principle calculations:*

Our first-principles calculations were carried out by Vienna ab initio simulation package (VASP) based on density functional theory (DFT).<sup>[5]</sup> Projector augmented wave (PAW) potentials was utilized to simulate electron-ion interactions.<sup>[6]</sup> In addition, the generalized gradient approximation with Perdew Burke Ernzerhof (GGA-PBE) functional were employed to approximate exchange and correlation effects when relaxing the atomic structure, where all models were fully relaxed with self-consistency accuracy of  $10^{-5}$  eV.<sup>[7]</sup> The cut-off energy (450 eV) for the plane-wave basis restriction and the  $K$ -points were taken under Monkhorst-Pack for the Brillouin-zone integration. To prevent interaction between two neighboring surfaces, a vacuum slab of 20 Å was employed in  $z$  direction for NiO with the calculated fully relaxed lattice constants of  $a = b = c = 4.18$  Å. A  $2 \times 2$  supercell was used to calculate the electronic property and hydrogen evolution activity.

## References

1. M. Ma, Y. Liu, X. Ma, R. Ge, F. Qu, Z. Liu, G. Du, A. M. Asiri, Y. Yao, X. Sun, *Sustainable Energy Fuels*, 2017, 1, 1287-1291
2. K. L. Nardi, N. Yang, C. F. Dickens, A. L. Strickler, S. F. Bent, *Adv. Energy Mater.* 2015, 5, 1500412
3. S. F. Bernicke, B. Eckhardt, A. Lippitz, E. Ortel, D. Bernsmeier, R. Schmack, R. Kraehnert, *Chemistry Select* 2016, 3, 482-489
4. J. Wang, K. Li, H. Zhong, D. Xu, Z. Wang, Z. Jiang, Z. Wu, X. Zhang, *Angew. Chem. Int. Ed.* 2015, 54, 10530-10534
5. G. Y. Sun, J. Kurtia, P. Rajczy, M. Kertesza, J. Hafner, G. Kresse, *J. Mol. Struct. (Theochem.)* 624 (2003) 37.
6. G. Kresse, D. Joubert, *Phys. Rev. B* 59 (1999) 1758.
7. P. E. Blöchl, *Phys. Rev. B* 50(24) (1994) 17953.
